# Supplementary material
Source: PubMed Central journal article supplement (PMC4375484)
Supplement: supp_M114.591800_jbc.M114.591800-1.pdf [file supp_M114.591800_jbc.M114.591800-1.pdf]

**Experiment**

**DnarL\_R1 vs.H37Rv\_R1**

**DATASET S1**

**AEROBIC GROWTH (- Nitrate)**

**DnarL\_R2 vs.H37Rv\_R2(DS)**

| Gene    | Fold_DnarL_R1 vs.H37Rv_R1 | Fold_DnarL_R2 vs.H37Rv_R2(DS) | Geomean Fold_DnarL | SD   | P-value | Regulation | Description                                         |
|---------|---------------------------|-------------------------------|--------------------|------|---------|------------|-----------------------------------------------------|
| PE20    | 0.965                     | 1.425                         | 1.195              | 0.52 | 0.100   | Up         | Rv1806, PE FAMILY PROTEIN                           |
| lat     | -0.801                    | -1.415                        | -1.108             | 0.14 | 0.131   | Down       | Rv3290c, PROBABLE L-LYSINE-EPSILON AMINOTRANSFERASE |
| PPE39   | -1.444                    | -1.186                        | -1.315             | 0.05 | 0.057   | Down       | Rv2353c, PPE FAMILY PROTEIN                         |
| Rv0188  | -1.146                    | -1.796                        | -1.471             | 0.12 | 0.139   | Down       | Rv0188, PROBABLE CONSERVED TRANSMEMBRANE PROTEIN    |
| Rv3289c | -1.044                    | -1.401                        | -1.223             | 0.08 | 0.078   | Down       | Rv3289c, POSSIBLE TRANSMEMBRANE PROTEIN             |

## Experiment

DnarL\_N\_R1 vs.H37Rv\_N\_R1

DATASET S2

AEROBIC GROWTH (+NITRATE)

DnarL\_N\_R2 vs.H37Rv\_N\_R2(DS)

| Gene    | Fold_DnarL_N_R1 vs.H37Rv | Fold_DnarL_N_R2 vs.H37Rv_N | Geomean Fold_DnarL_N | SD    | P-value | Regulation | Description                                                        |
|---------|--------------------------|----------------------------|----------------------|-------|---------|------------|--------------------------------------------------------------------|
| PPE38   | 1.250                    | 0.998                      | 1.124                | 0.269 | 0.055   | Up         | Rv2352c, PPE FAMILY PROTEIN                                        |
| rpmG1   | 1.157                    | 0.942                      | 1.049                | 0.219 | 0.047   | Up         | Rv2057c, Probable ribosomal protein L33                            |
| Rv0076c | 1.136                    | 1.077                      | 1.107                | 0.062 | 0.013   | Up         | Rv0076c, PROBABLE MEMBRANE PROTEIN                                 |
| Rv0268c | 1.189                    | 0.916                      | 1.052                | 0.277 | 0.060   | Up         | Rv0268c, HYPOTHETICAL PROTEIN                                      |
| Rv0965c | 0.895                    | 1.012                      | 0.954                | 0.112 | 0.026   | Up         | Rv0965c, CONSERVED HYPOTHETICAL PROTEIN                            |
| Rv1765A | 1.469                    | 1.130                      | 1.300                | 0.411 | 0.074   | Up         | Rv1765A, PUTATIVE TRANSPOSASE FRAGMENT                             |
| Rv2023A | 1.052                    | 0.953                      | 1.003                | 0.098 | 0.022   | Up         | Rv2023A, HYPOTHETICAL PROTEIN                                      |
| Rv2136c | 1.195                    | 1.036                      | 1.116                | 0.169 | 0.035   | Up         | Rv2136c, Possible conserved transmembrane protein                  |
| Rv2142c | 1.440                    | 1.392                      | 1.416                | 0.063 | 0.011   | Up         | Rv2142c, HYPOTHETICAL PROTEIN                                      |
| Rv2452c | 1.500                    | 1.997                      | 1.749                | 0.823 | 0.108   | Up         | Rv2452c, HYPOTHETICAL PROTEIN                                      |
| Rv2562  | 1.006                    | 0.889                      | 0.948                | 0.111 | 0.026   | Up         | Rv2562, CONSERVED HYPOTHETICAL PROTEIN                             |
| Rv2961  | 1.549                    | 0.955                      | 1.252                | 0.699 | 0.128   | Up         | Rv2961, PROBABLE TRANSPOSASE                                       |
| Rv3742c | 1.027                    | 0.886                      | 0.957                | 0.135 | 0.031   | Up         | Rv3742c, POSSIBLE OXIDOREDUCTASE                                   |
| Rv3745c | 1.272                    | 0.813                      | 1.043                | 0.466 | 0.100   | Up         | Rv3745c, CONSERVED HYPOTHETICAL PROTEIN                            |
| whiB7   | 1.323                    | 1.161                      | 1.242                | 0.188 | 0.036   | Up         | Rv3197A, PROBABLE TRANSCRIPTIONAL REGULATORY PROTEIN WHIB-LIKE V   |
| acg     | -1.391                   | -1.419                     | -1.144               | 0.005 | 0.006   | Down       | Rv2032, Conserved hypothetical protein Acg                         |
| fdxA    | -1.312                   | -1.744                     | -1.120               | 0.074 | 0.094   | Down       | Rv2007c, PROBABLE FERREDOXIN FDxA                                  |
| gltA1   | -1.812                   | -1.393                     | -1.350               | 0.068 | 0.091   | Down       | Rv1131, PROBABLE CITRATE SYNTHASE I GLTA1                          |
| lat     | -1.371                   | -0.856                     | -1.123               | 0.117 | 0.111   | Down       | Rv3290c, PROBABLE L-LYSINE-EPSILON AMINOTRANSFERASE LAT L-LYSINE A |
| mmpL6   | -0.888                   | -1.040                     | -0.951               | 0.038 | 0.034   | Down       | Rv1557, PROBABLE CONSERVED TRANSMEMBRANE TRANSPORT PROTEIN M       |
| narK2   | -1.005                   | -0.821                     | -1.030               | 0.048 | 0.041   | Down       | Rv1737c, POSSIBLE NITRATENITRITE TRANSPORTER NARK2                 |
| narL    | -6.067                   | -6.545                     | -2.064               | 0.003 | 0.104   | Down       | Rv0844c, POSSIBLE NITRATENITRITE RESPONSE TRANSCRIPTIONAL REGULAT  |
| pdhC    | -0.950                   | -1.013                     | -0.988               | 0.016 | 0.014   | Down       | Rv2495c, PROBABLE DIHYDROLIPOAMIDE S-ACETYLTRANSFERASE E2 COMP     |
| Rv0079  | -1.488                   | -1.383                     | -1.228               | 0.019 | 0.023   | Down       | Rv0079, HYPOTHETICAL PROTEIN                                       |
| Rv0188  | -0.936                   | -1.190                     | -0.987               | 0.060 | 0.056   | Down       | Rv0188, PROBABLE CONSERVED TRANSMEMBRANE PROTEIN                   |
| Rv0569  | -0.961                   | -1.041                     | -1.033               | 0.020 | 0.018   | Down       | Rv0569, CONSERVED HYPOTHETICAL PROTEIN                             |
| Rv1130  | -1.247                   | -1.271                     | -1.084               | 0.005 | 0.005   | Down       | Rv1130, CONSERVED HYPOTHETICAL PROTEIN                             |
| Rv1687c | -2.161                   | -2.058                     | -1.489               | 0.012 | 0.023   | Down       | Rv1687c, PROBABLE CONSERVED ATP-BINDING PROTEIN ABC TRANSPORTER    |
| Rv1701  | -0.914                   | -1.057                     | -0.962               | 0.035 | 0.031   | Down       | Rv1701, PROBABLE INTEGRASERECOMBINASE                              |
| Rv1733c | -1.116                   | -0.861                     | -1.055               | 0.063 | 0.056   | Down       | Rv1733c, PROBABLE CONSERVED TRANSMEMBRANE PROTEIN                  |
| Rv1734c | -1.485                   | -2.031                     | -1.213               | 0.080 | 0.118   | Down       | Rv1734c, CONSERVED HYPOTHETICAL PROTEIN                            |
| Rv1738  | -1.696                   | -1.822                     | -1.298               | 0.018 | 0.028   | Down       | Rv1738, CONSERVED HYPOTHETICAL PROTEIN                             |
| Rv1856c | -1.162                   | -1.101                     | -1.067               | 0.013 | 0.013   | Down       | Rv1856c, POSSIBLE OXIDOREDUCTASE                                   |
| Rv1996  | -2.601                   | -2.466                     | -1.645               | 0.011 | 0.030   | Down       | Rv1996, CONSERVED HYPOTHETICAL PROTEIN                             |
| Rv2028c | -1.394                   | -1.140                     | -1.159               | 0.052 | 0.056   | Down       | Rv2028c, CONSERVED HYPOTHETICAL PROTEIN                            |
| Rv2087  | -0.955                   | -1.716                     | -1.038               | 0.150 | 0.161   | Down       | Rv2087, CONSERVED HYPOTHETICAL PROTEIN                             |
| Rv2627c | -0.937                   | -1.061                     | -0.990               | 0.030 | 0.027   | Down       | Rv2627c, CONSERVED HYPOTHETICAL PROTEIN                            |
| Rv2650c | -1.068                   | -1.339                     | -1.046               | 0.058 | 0.059   | Down       | Rv2650c, POSSIBLE phiRv2 PROPHAGE PROTEIN                          |
| Rv2989  | -0.997                   | -1.027                     | -1.042               | 0.007 | 0.007   | Down       | Rv2989, PROBABLE TRANSCRIPTIONAL REGULATORY PROTEIN                |
| Rv3094c | -1.141                   | -1.152                     | -1.060               | 0.002 | 0.002   | Down       | Rv3094c, CONSERVED HYPOTHETICAL PROTEIN                            |
| Rv3127  | -1.439                   | -1.751                     | -1.173               | 0.051 | 0.068   | Down       | Rv3127, CONSERVED HYPOTHETICAL PROTEIN                             |
| Rv3128c | -1.524                   | -1.451                     | -1.253               | 0.013 | 0.016   | Down       | Rv3128c, CONSERVED HYPOTHETICAL PROTEIN                            |
| Rv3130c | -1.951                   | -1.968                     | -1.430               | 0.002 | 0.004   | Down       | Rv3130c, CONSERVED HYPOTHETICAL PROTEIN                            |
| Rv3131  | -4.092                   | -3.987                     | -1.798               | 0.003 | 0.023   | Down       | Rv3131, CONSERVED HYPOTHETICAL PROTEIN                             |
| Rv3134c | -1.094                   | -1.166                     | -1.052               | 0.016 | 0.016   | Down       | Rv3134c, CONSERVED HYPOTHETICAL PROTEIN                            |

| Experiment                                               |                        |                        |                       |            |            |              |                                                                                                                                                       |
|----------------------------------------------------------|------------------------|------------------------|-----------------------|------------|------------|--------------|-------------------------------------------------------------------------------------------------------------------------------------------------------|
| DL48h hyp-rep1 JM11_Cy5 vs. Rv48h hyp-rep1 JM9_Cy3       |                        |                        |                       | DATASET 53 |            | 48 h HYPOXIA |                                                                                                                                                       |
| DL48h hyp-rep2 JM12_Cy3 vs. Rv48h hyp-rep2 JM10_Cy5 (DS) |                        |                        |                       |            |            |              |                                                                                                                                                       |
| Gene                                                     | Fold_delta48h hyp_rep1 | Fold_delta48h hyp_rep2 | Geomean Fold_delta48h | SD         | Regulation | P-value      | Description                                                                                                                                           |
| accA2                                                    | 0.721                  | 0.700                  | 0.710                 | 0.017      | Up         | 0.005        | Rv0973c, PROBABLE ACETYL-PROPIONYL-COENZYME A CARBOXYLASE ALPHA CHAIN ALPHA SUBUNIT ACCA2: BIOTIN CARBOXYLASE + BIOTIN CARBOXYL CARRIER PROTEIN BCCP  |
| icl                                                      | 0.626                  | 0.609                  | 0.618                 | 0.012      | Up         | 0.004        | Rv0467, ISOCITRATE LYASE ICL ISOCITRASE ISOCITRATASE                                                                                                  |
| mmpl13b                                                  | 1.303                  | 1.536                  | 1.420                 | 0.306      | Up         | 0.051        | Rv1146, PROBABLE CONSERVED TRANSMEMBRANE TRANSPORT PROTEIN MMPL13B                                                                                    |
| moaB1                                                    | 0.708                  | 2.449                  | 1.579                 | 2.705      | Up         | 0.315        | Rv3110, PROBABLE PTERIN-4-ALPHA-CARBINOLAMINE DEHYDRATASE MOA1 PHS 4-ALPHA- HYDROXY-TETRAHYDROPTERIN DEHYDRATASE PTERIN-4-A-CARBINOLAMINE DEHYDRATASE |
| ppsC                                                     | 0.732                  | 0.672                  | 0.702                 | 0.048      | Up         | 0.013        | Rv2933, PHENOLPTHIACEROL SYNTHESIS TYPE-I POLYKETIDE SYNTHASE PPSC                                                                                    |
| Rv0850                                                   | 0.891                  | 1.798                  | 1.345                 | 1.148      | Up         | 0.188        | Rv0850, PUTATIVE TRANSPOSASE FRAGMENT                                                                                                                 |
| Rv1118c                                                  | 0.620                  | 0.928                  | 0.774                 | 0.259      | Up         | 0.067        | Rv1118c, CONSERVED HYPOTHETICAL PROTEIN                                                                                                               |
| Rv2265                                                   | 1.054                  | 1.956                  | 1.505                 | 1.275      | Up         | 0.187        | Rv2265, Possible conserved integral membrane protein                                                                                                  |
| Rv2812                                                   | 0.611                  | 2.682                  | 1.647                 | 3.457      | Up         | 0.351        | Rv2812, PROBABLE TRANSPOSASE                                                                                                                          |
| Rv3333c                                                  | 0.604                  | 4.723                  | 2.663                 | 17.604     | Up         | 0.463        | Rv3333c, HYPOTHETICAL PROLINE RICH PROTEIN                                                                                                            |
| Rv3448                                                   | 0.735                  | 1.302                  | 1.019                 | 0.567      | Up         | 0.122        | Rv3448, PROBABLE CONSERVED INTEGRAL MEMBRANE PROTEIN                                                                                                  |
| Rv3640c                                                  | 0.685                  | 4.110                  | 2.397                 | 11.077     | Up         | 0.441        | Rv3640c, PROBABLE TRANSPOSASE                                                                                                                         |
| Rv3839                                                   | 0.669                  | 1.574                  | 1.121                 | 0.980      | Up         | 0.188        | Rv3839, CONSERVED HYPOTHETICAL PROTEIN                                                                                                                |
| tyrT                                                     | 2.735                  | 0.927                  | 1.831                 | 3.363      | Up         | 0.323        | MTB000005, tRNA-Tyr                                                                                                                                   |
| ugpA                                                     | 0.750                  | 2.219                  | 1.485                 | 2.102      | Up         | 0.279        | Rv2835c, PROBABLE Sn-GLYCEROL-3-PHOSPHATE TRANSPORT INTEGRAL MEMBRANE PROTEIN ABC TRANSPORTER UGPA                                                    |
| alaT                                                     | -0.685                 | -1.183                 | -0.934                | 0.128      | Down       | 0.108        | MTB000002, tRNA-Ala                                                                                                                                   |
| alaU                                                     | -1.229                 | -1.495                 | -1.362                | 0.051      | Down       | 0.058        | MTB000041, tRNA-Ala                                                                                                                                   |
| cysU                                                     | -0.989                 | -0.643                 | -0.816                | 0.097      | Down       | 0.076        | MTB000037, tRNA-Cys                                                                                                                                   |
| gltA1                                                    | -1.835                 | -1.103                 | -1.469                | 0.131      | Down       | 0.155        | Rv1131, PROBABLE CITRATE SYNTHASE I GLTA1                                                                                                             |
| Rv0188                                                   | -1.088                 | -0.741                 | -0.914                | 0.091      | Down       | 0.076        | Rv0188, PROBABLE CONSERVED TRANSMEMBRANE PROTEIN                                                                                                      |
| Rv1130                                                   | -1.013                 | -1.502                 | -1.258                | 0.101      | Down       | 0.106        | Rv1130, CONSERVED HYPOTHETICAL PROTEIN                                                                                                                |
| Rv2452c                                                  | -0.762                 | -0.745                 | -0.753                | 0.005      | Down       | 0.004        | Rv2452c, HYPOTHETICAL PROTEIN                                                                                                                         |
| Rv2699c                                                  | -0.661                 | -0.759                 | -0.710                | 0.029      | Down       | 0.022        | Rv2699c, CONSERVED HYPOTHETICAL PROTEIN                                                                                                               |
| valT                                                     | -0.745                 | -0.686                 | -0.716                | 0.018      | Down       | 0.013        | MTB000035, tRNA-Val                                                                                                                                   |
| valU                                                     | -0.687                 | -1.308                 | -0.997                | 0.154      | Down       | 0.133        | MTB000038, tRNA-Val                                                                                                                                   |
| valV                                                     | -1.074                 | -1.025                 | -1.050                | 0.012      | Down       | 0.011        | MTB000027, tRNA-Val                                                                                                                                   |
